# Supplementary material
Source: PubMed Central journal article supplement (PMC9255645)
Supplement: NIHMS1804111-supplement-1.pdf [file NIHMS1804111-supplement-1.pdf]

# THE LANCET

## Diabetes & Endocrinology

### Supplementary appendix

This appendix formed part of the original submission. We post it as supplied by the authors.

Supplement to: Wilson L M, Jacobs P G, Riddell M C, et al. Opportunities and challenges in closed-loop systems in type 1 diabetes. *Lancet Diabetes Endocrinol* 2021; published online Nov 8. [http://dx.doi.org/10.1016/S2213-8587\(21\)00289-8](http://dx.doi.org/10.1016/S2213-8587(21)00289-8).

**Table 1a**

| <b>Automated handling of exercise</b> |                                                                                                                                                                                                                                                                                                                                                                                                                                            |
|---------------------------------------|--------------------------------------------------------------------------------------------------------------------------------------------------------------------------------------------------------------------------------------------------------------------------------------------------------------------------------------------------------------------------------------------------------------------------------------------|
| <b>Considerations</b>                 | Current commercially available closed-loop systems may facilitate improved glucose control during and exercise, but hypoglycemia can still occur <sup>1-3</sup>                                                                                                                                                                                                                                                                            |
|                                       | All systems allow higher glucose targets for exercise: <ul style="list-style-type: none"> <li>• These should be initiated 60-90 minutes before exercise onset to allow the levels of circulating insulin to decrease<sup>4</sup></li> <li>• Typically, still requires small amounts of carbohydrate (~15-30g), either just before the exercise starts, or if the glucose falls below 7.0 mmol/L during the activity<sup>5</sup></li> </ul> |
|                                       | All forms of prolonged exercise can result in increased hypoglycemia risk over the next 6-12 hours and higher glucose targets may be needed in recovery <sup>6</sup>                                                                                                                                                                                                                                                                       |
| <b>User actions required</b>          | For exercise within two hours of a meal, a 25-75% reduction in bolus insulin is recommended for insulin-only closed-loop systems <sup>4</sup>                                                                                                                                                                                                                                                                                              |
|                                       | Typically, only aerobic and mixed forms of physical activity lasting >30 min require higher glucose targets and reduced closed-loop insulin delivery                                                                                                                                                                                                                                                                                       |
|                                       | More intense or brief forms of anaerobic exercise may require insulin administration for avoidance of post-exercise hyperglycemia <sup>7</sup>                                                                                                                                                                                                                                                                                             |
| <b>Future work</b>                    | Physiologic models of various exercise types and intensities <sup>8</sup> could inform an unannounced exercise-aware model predictive controller for better handling of hormone delivery around exercise <sup>9</sup>                                                                                                                                                                                                                      |
|                                       | Additional inputs may better inform exercise management (e.g., physical activity wearables, lactate, ketones)                                                                                                                                                                                                                                                                                                                              |
|                                       | User specific factors (sex, muscle/fat mass, fitness levels, individual goals such as weight loss/improved performance etc.) will need to be considered                                                                                                                                                                                                                                                                                    |

**Table 1b**

| <b>Multihormone closed-loop systems</b> |                                                                                                                                                                                                  |
|-----------------------------------------|--------------------------------------------------------------------------------------------------------------------------------------------------------------------------------------------------|
| <b>Glucagon</b>                         |                                                                                                                                                                                                  |
| <b>Pros</b>                             | Reduce exercise-induced and insulin-induced hypoglycemia while maintaining glucose time in range. <sup>10,11</sup>                                                                               |
| <b>Cons</b>                             | Increased system complexity and cost                                                                                                                                                             |
|                                         | Nausea and vomiting                                                                                                                                                                              |
|                                         | Hypoglycemia - if glucagon is called for and infusion set failure occurs                                                                                                                         |
|                                         | Hyperglycemia or diabetic ketoacidosis (DKA) - if glucagon is delivered in response to an inaccurate low CGM reading                                                                             |
| <b>Future work</b>                      | Dosing strategies to reduce gastrointestinal side effects (titration up over time, micro dosing, continuous infusion)                                                                            |
|                                         | Evaluation for changes in insulin dose requirements with various glucagon dosing strategies                                                                                                      |
|                                         | Need for long term human trials for assessment of overall safety and potential immunogenicity of glucagon analogs                                                                                |
|                                         | Need for studies on stability and feasibility in pumps                                                                                                                                           |
| <b>Pramlintide</b>                      |                                                                                                                                                                                                  |
| <b>Pros</b>                             | Reduces glucose excursions after a meal <sup>12</sup> by slowing gastric emptying <sup>13</sup> and inhibiting endogenous post-meal glucagon release <sup>14</sup>                               |
|                                         | Opportunity for a fully automated closed-loop system by combining automated meal detection, ultra-fast acting insulin analogs and pramlintide for superior daytime glucose control <sup>15</sup> |
| <b>Cons</b>                             | Nausea and vomiting                                                                                                                                                                              |
|                                         | Post-meal hypoglycemia can occur                                                                                                                                                                 |
| <b>Future work</b>                      | Fixed ratio co-formulation pramlintide/insulin may soon be available <sup>16</sup>                                                                                                               |
|                                         | Dosing strategies to reduce gastrointestinal side effects (titration up over time, micro dosing, continuous infusion)                                                                            |
|                                         | Need for studies on stability and feasibility in pumps                                                                                                                                           |

## References:

1. Eckstein ML, Weilguni B, Tauschmann M, et al. Time in range for closed-loop systems versus standard of care during physical exercise in people with type 1 diabetes: A systematic review and meta-analysis. *J Clin Med* 2021; **10**(11).
2. Dovic K, Macedoni M, Bratina N, et al. Closed-loop glucose control in young people with type 1 diabetes during and after unannounced physical activity: A randomised controlled crossover trial. *Diabetologia* 2017; **60**(11): 2157–67.
3. Sherr JL, Cengiz E, Palerm CC, et al. Reduced hypoglycemia and increased time in target using closed-loop insulin delivery during nights with or without antecedent afternoon exercise in type 1 diabetes. *Diabetes Care* 2013; **36**(10): 2909–14.
4. Zaharieva DP, Messer LH, Paldus B, O'Neal DN, Maahs DM, Riddell MC. Glucose control during physical activity and exercise using closed loop technology in adults and adolescents with type 1 diabetes. *Can J Diabetes* 2020; **44**(8): 740–9.
5. Patel NS, Van Name MA, Cengiz E, et al. Mitigating reductions in glucose during exercise on closed-loop insulin delivery: The ex-snacks study. *Diabetes Technol Ther* 2016; **18**(12): 794–9.
6. Riddell MC, Li Z, Beck RW, et al. More time in glucose range during exercise days than sedentary days in adults living with type 1 diabetes. *Diabetes Technol Ther* 2021; **23**(5): 376–83.
7. Aronson R, Brown RE, Li A, Riddell MC. Optimal insulin correction factor in post-high-intensity exercise hyperglycemia in adults with type 1 diabetes: The fit study. *Diabetes Care* 2019; **42**(1): 10–6.
8. Nguyen TP, Jacobs PG, Castle JR, et al. Separating insulin-mediated and non-insulin-mediated glucose uptake during and after aerobic exercise in type 1 diabetes. *Am J Physiol Endocrinol Metab* 2021; **320**(3): E425–E37.
9. Resalat N, El Youssef J, Reddy R, Jacobs PG. Design of a dual-hormone model predictive control for artificial pancreas with exercise model. *Annu Int Conf IEEE Eng Med Biol Soc* 2016; **2016**: 2270–3.
10. Castellanos LE, Balliro CA, Sherwood JS, et al. Performance of the insulin-only iLet bionic pancreas and the bihormonal iLet using dasiglucagon in adults with type 1 diabetes in a home-use setting. *Diabetes Care* 2021.
11. Wilson LM, Jacobs PG, Ramsey KL, et al. Dual-hormone closed-loop system using a liquid stable glucagon formulation versus insulin-only closed-loop system compared with a predictive low glucose suspend system: An open-label, outpatient, single-center, crossover, randomized controlled trial. *Diabetes Care* 2020; **43**(11): 2721–9.
12. Riddle MC, Nahra R, Han J, et al. Control of postprandial hyperglycemia in type 1 diabetes by 24-hour fixed-dose coadministration of pramlintide and regular human insulin: A randomized, two-way crossover study. *Diabetes Care* 2018; **41**(11): 2346–52.
13. Vella A, Lee JS, Camilleri M, et al. Effects of pramlintide, an amylin analogue, on gastric emptying in type 1 and 2 diabetes mellitus. *Neurogastroenterol Motil* 2002; **14**(2): 123–31.
14. Nyholm B, Orskov L, Hove KY, et al. The amylin analog pramlintide improves glycemic control and reduces postprandial glucagon concentrations in patients with type 1 diabetes mellitus. *Metabolism* 1999; **48**(7): 935–41.
15. Tsoukas MA, Cohen E, Legault L, et al. Alleviating carbohydrate counting with a fiasp-plus-pramlintide closed-loop delivery system (artificial pancreas): Feasibility and pilot studies. *Diabetes Obes Metab* 2021; **23**(9): 2090–8.
16. Meiffren G, Andersen G, Eloy R, et al. 112-LB: ADO09, a coformulation of pramlintide (pram) and insulin A21G, improves postprandial glucose vs. Novolog in type 1 diabetes (T1D). *Diabetes* 2020; **69**(Supplement 1): 112-LB.
